# Supplementary material for: Hierarchical ZnO hollow microspheres with exposed (001) facets as promising catalysts for the thermal decomposition of ammonium perchlorate
Source: Royal Society of Chemistry journal article supplement (doi:10.1039/c5ce01160d), 2015-01-01
Supplement: c5ce01160d1.pdf [file c5ce01160d1.pdf]

## Supporting materials for

# Hierarchical ZnO hollow microspheres with exposed (001) facets as a promising catalyst for the thermal decomposition of ammonium perchlorate

*Shouqin Tian<sup>a,\*</sup>, Neng Li<sup>a</sup>, Dawen Zeng<sup>b,\*</sup>, Haitao Li<sup>b</sup>, Gen Tang<sup>c</sup>, Aimin Pang<sup>c</sup>, Changsheng*

*Xie<sup>b</sup>, Xiujian Zhao<sup>a</sup>*

<sup>a</sup> State Key Laboratory of Silicate Materials for Architectures, Wuhan University of Technology,  
No. 122, Luoshi Road, Wuhan 430070, China

<sup>b</sup> Nanomaterials and Smart Sensors Research Laboratory (NSSRL), State Key Laboratory of  
Material Processing and Die & Mould Technology, Department of Materials Science and  
Engineering, Huazhong University of Science and Technology (HUST), No. 1037, Luoyu Road,  
Wuhan 430074, China

<sup>c</sup> HuBei Institute of Aerospace Chemotechnology, No. 58, Qinghe Road, Xiangyang 441003,  
China

\*Corresponding authors. Tel.: +86-027-87559835; Fax: +86-27-87543778.

E-mail addresses: [tiansq@whut.edu.cn](mailto:tiansq@whut.edu.cn); [dwzeng@mail.hust.edu.cn](mailto:dwzeng@mail.hust.edu.cn);

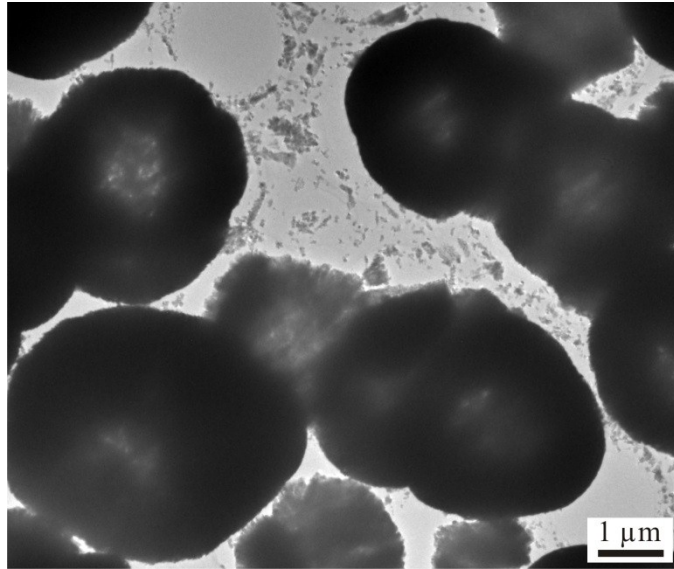

**Fig. S1** TEM image of ZnO hollow microspheres.

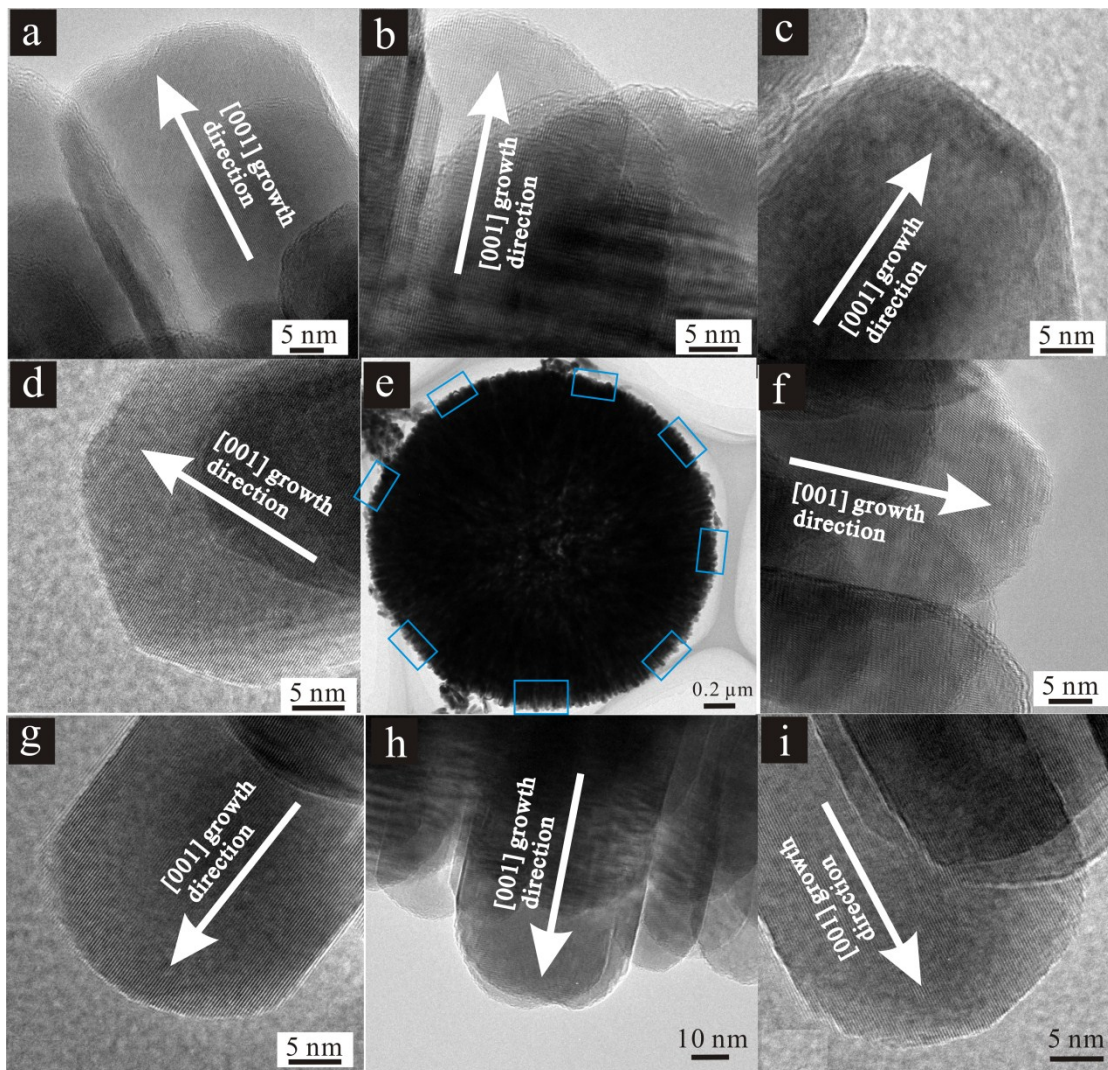

**Fig. S2** The HRTEM images of different parts of surface of a single ZnO hollow microsphere (e): (a) upper left, (b) top, (c) upper right, (d) left, (f) right, (g) bottom left, (h) bottom, (i) bottom right.

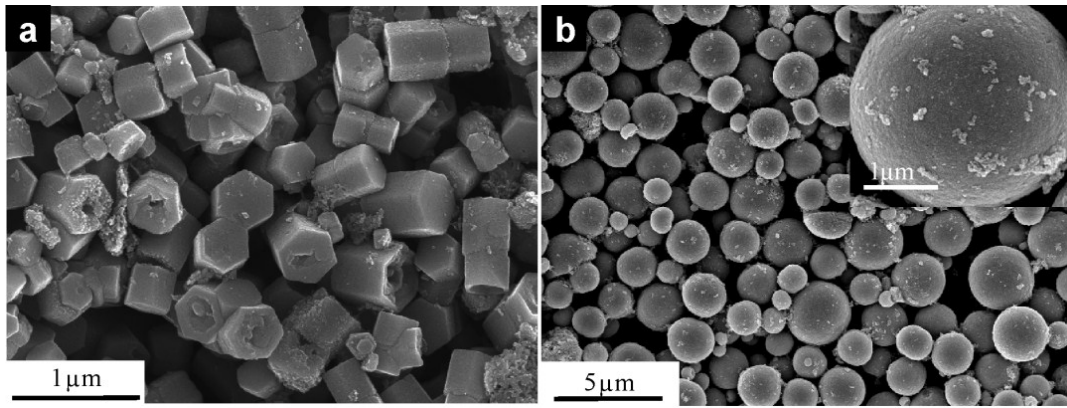

**Fig. S3** FE-SEM images of (a) the short prisms obtained from the control experiment in which methanol serves as a solvent instead of glycol and (b) the solid microspheres prepared in the control experiment without adding H<sub>2</sub>O, with a higher magnification FE-SEM image in the inset.

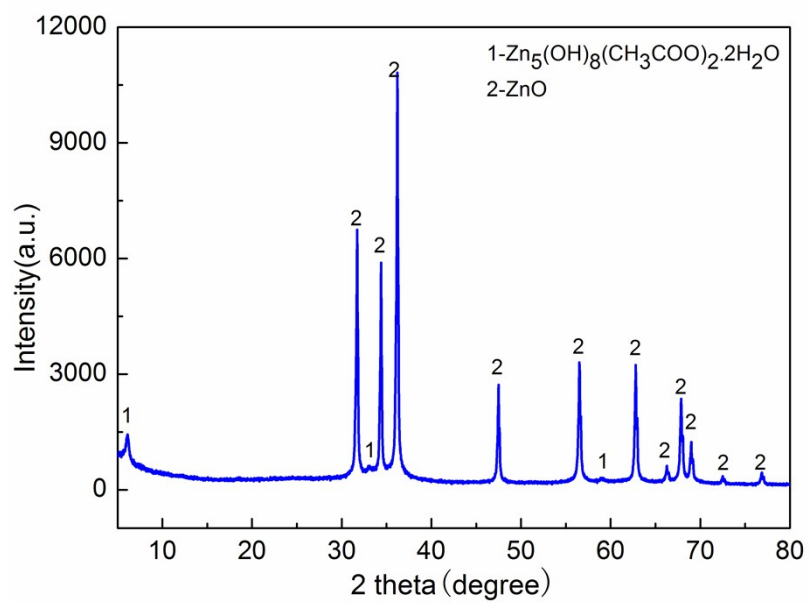

**Fig. S4** XRD pattern of samples at the reaction time of 0.5 h.

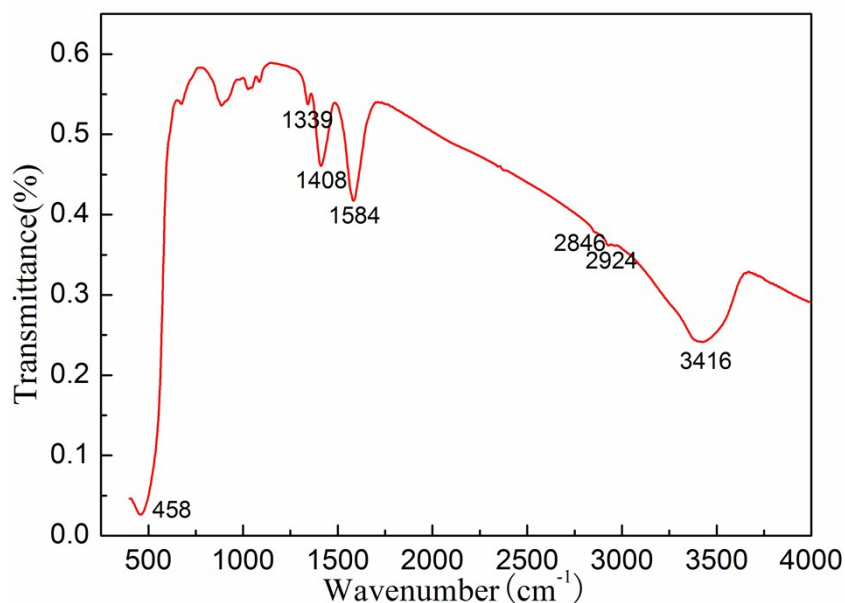

**Fig. S5** FTIR spectra of samples at the reaction time of 0.5 h.

The FTIR spectrum was displayed in Fig.S5. The broad absorption bands of the sample located at  $\sim 3416\text{ cm}^{-1}$  can be ascribed to the O-H stretching mode.<sup>1</sup> The bands at  $\sim 1339$  and  $\sim 1584\text{ cm}^{-1}$  can be probably attributed to the C-O and C-O-Zn stretching mode, respectively.<sup>2</sup> In addition, the bands at  $\sim 1408$ ,  $\sim 2924$ , and  $\sim 2846\text{ cm}^{-1}$  are due to  $\text{CH}_2$  bending vibration mode, asymmetric and symmetric stretching vibration modes, respectively.<sup>3</sup> The band at  $\sim 458\text{ cm}^{-1}$  can be ascribed to Zn-O stretching vibration mode,<sup>4</sup> indicating the formation of ZnO. These results also revealed that the initial product contains EG impurities.

Reference:

1. J. Rao, A. Yu, C. L. Shao, X. F. Zhou, *ACS Appl. Mater. Interface*, 2012, **4**, 5346-5352.
2. M. N. Kamalasanan, S. Chandra, *Thin Solid Film*, 1996, **288**, 112-115.
3. Y. N. Rajeswari, B. A. Chandra, *Appl. Phys. A: Mater. Sci. Process.*, 2011, **103**, 33-42.
4. R. Y. Hong, J. Z. Qian, J. X. Cao, *Powder Technol.*, 2006, **163**, 160-168.

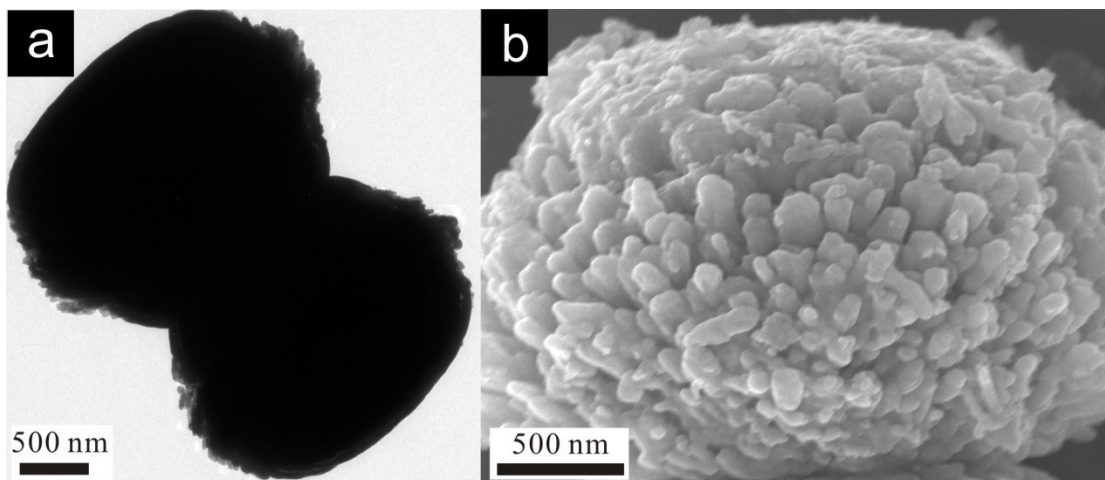

**Fig. S6** (a) TEM and (b) FE-SEM images of samples at the reaction time of 0.5 h.



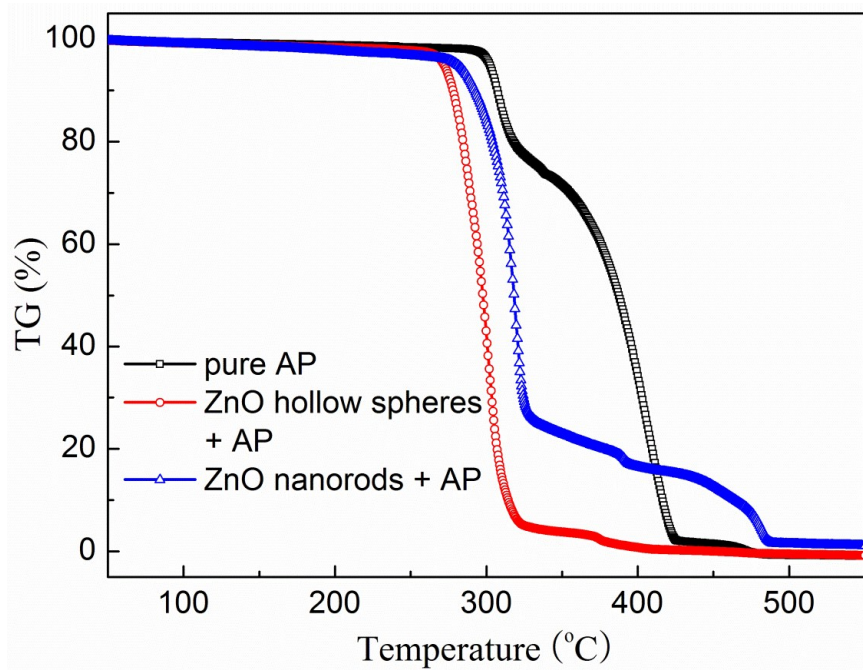

**Fig. S7** TG curves of pure AP and mixture of AP with the as-prepared ZnO particles at a heating rate of 20 K/min.



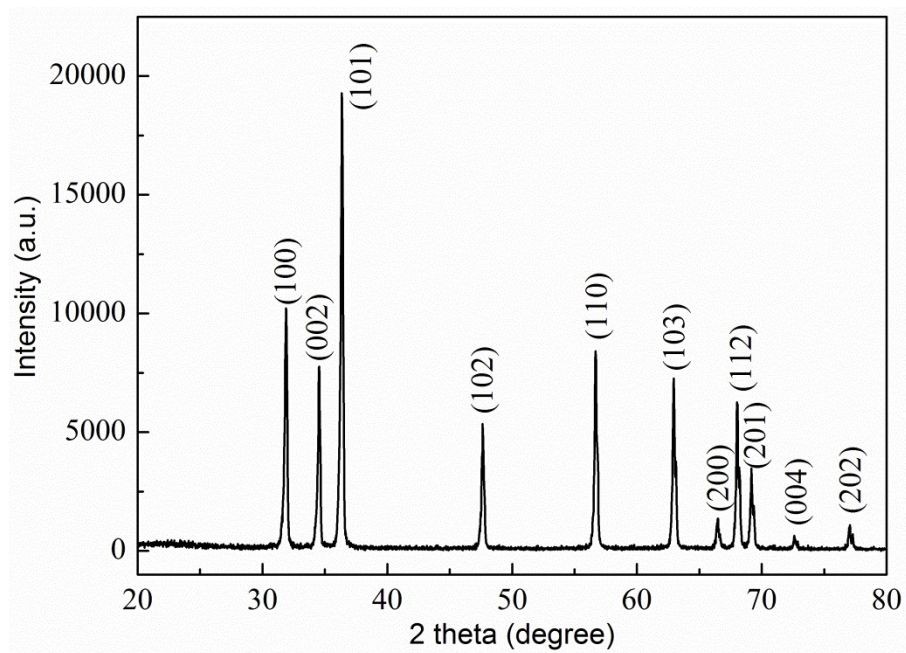

**Fig. S8** XRD patterns of ZnO dispersed nanorods.

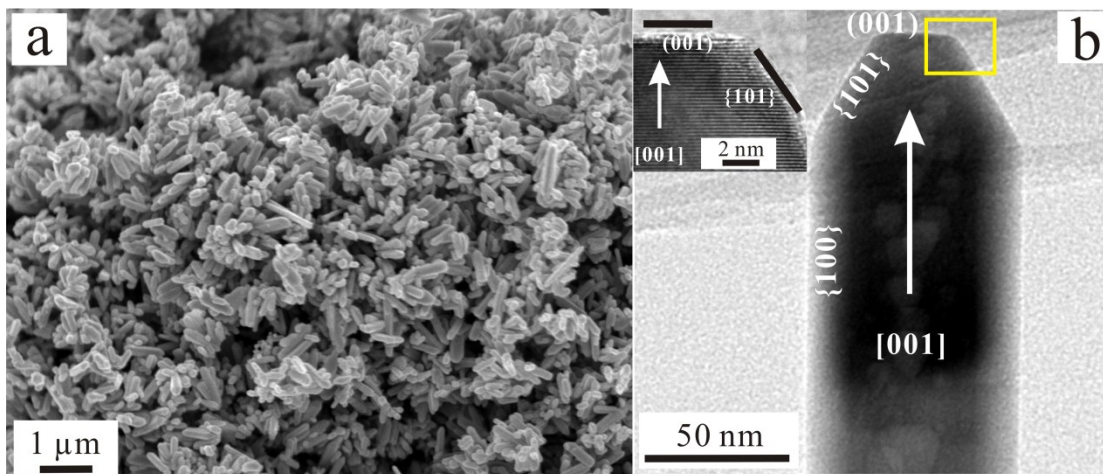

**Fig. S9** (a) The FE-SEM image of dispersed ZnO nanorods, and (b) the typical TEM image of a single ZnO nanorod, with HRTEM image in the inset.

The morphology of the dispersed ZnO nanorods is shown in Fig. S9(a). It can be seen that these nanorods are well dispersed rather than assembled into a hierarchical structure. The length of these nanorods is about 1 μm. To further observe these nanorods, TEM characterization was carried out. The TEM and HRTEM images are shown in Fig. S9(b). It can be seen that the diameter of these nanorods is about 60 nm and their surface is composed of {100} facets, {101} facets and (001) facet. Also, the {100} facets are the dominant surface of these nanorods.
